# Supplementary material for: Genome wide identification of QTL associated with yield and yield components in two popular wheat cultivars TAM 111 and TAM 112
Source: PubMed Central journal article supplement (PMC7710072; doi:10.1371/journal.pone.0237293), 2020-12-02

**S2 Fig: LOD profile and additive effects of QTLs detected in each of the 11 environments.** Top figure shows LOD profile with chromosomal position along the x-axis (cM of 25 LGs) and LOD score on the y-axis. Bottom figure show additive effect profile with chromosomal position along the x-axis and additive effects on the y-axis. Different yield and yield components traits are color coded as shown on the top of each panel. The positive additive effect means that the favorable alleles increasing the traits were from TAM 112 while those QTL with negative additive effects had favorable alleles from TAM 111. Traits include 1) Yield from combine plots (CombYld=Yld); 2) dry biomass from hand harvested 0.5 m long inner row sample from crown (DBM=BM); 3) grain weight from 2) as hand harvested dry grain weight (HHDG=BMYLD); 4) harvest index (HI); 5) kernels spike<sup>-1</sup> (KPS); 6) spikes m<sup>-2</sup> (SPM); 7) thousand kernel weight (TKW); 8) single head dry weight (SHDW); 9) single head dry grain weight (SHGW). Individual environments include A) 11BD, B) 12BD, C) 12CH, D) 13EP4, E) 13EP5, F) 14CH, G) 14EP4, H) 14EP5, I) 17BI, J) 17CVI, K) 17DMS

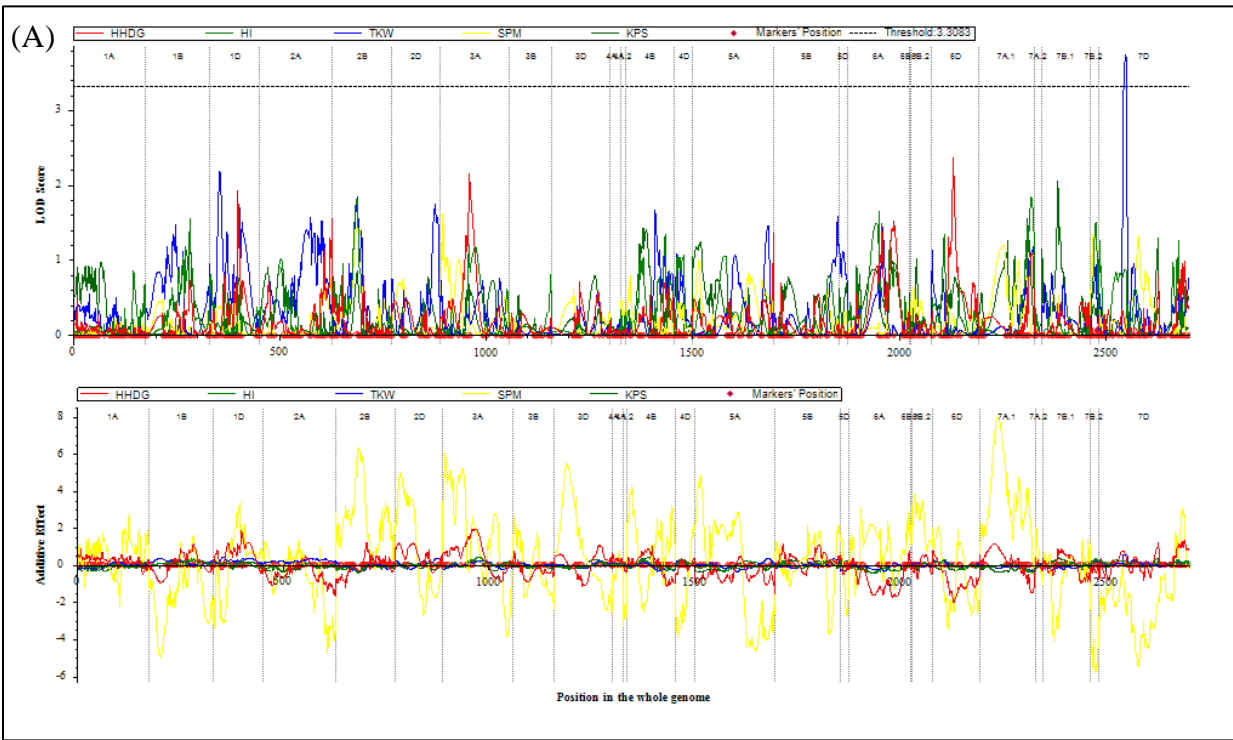

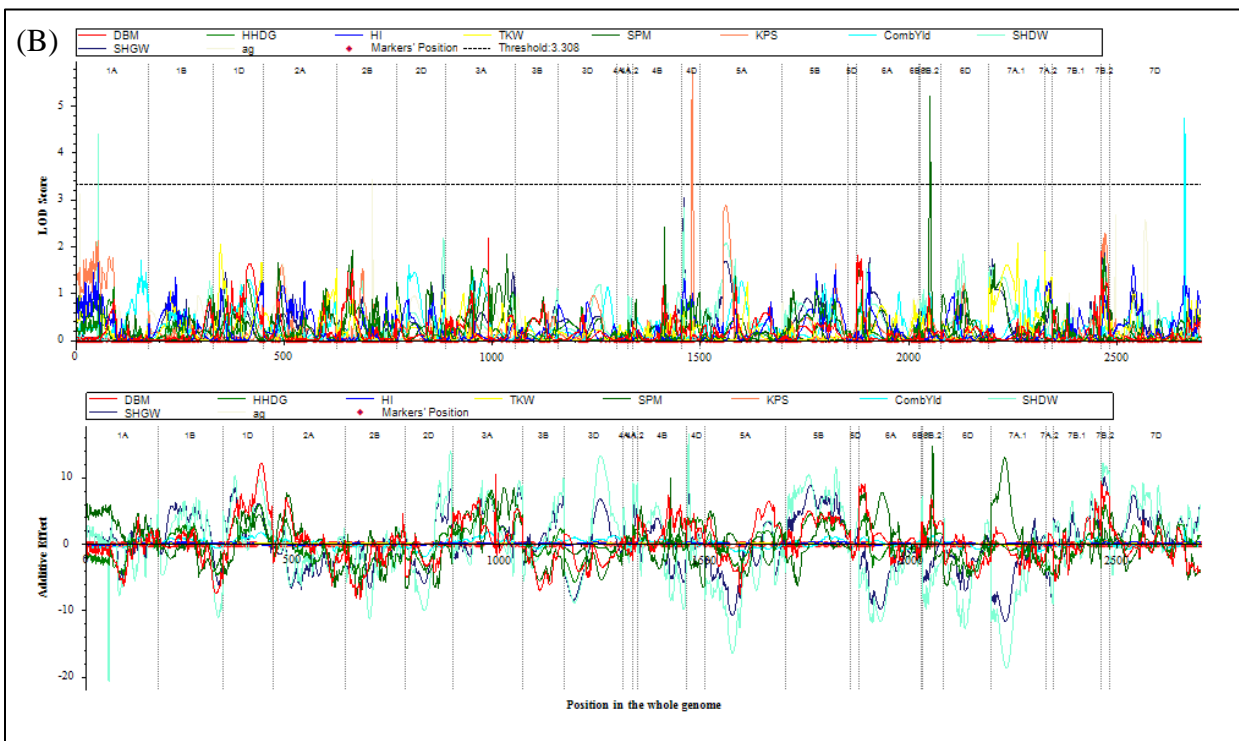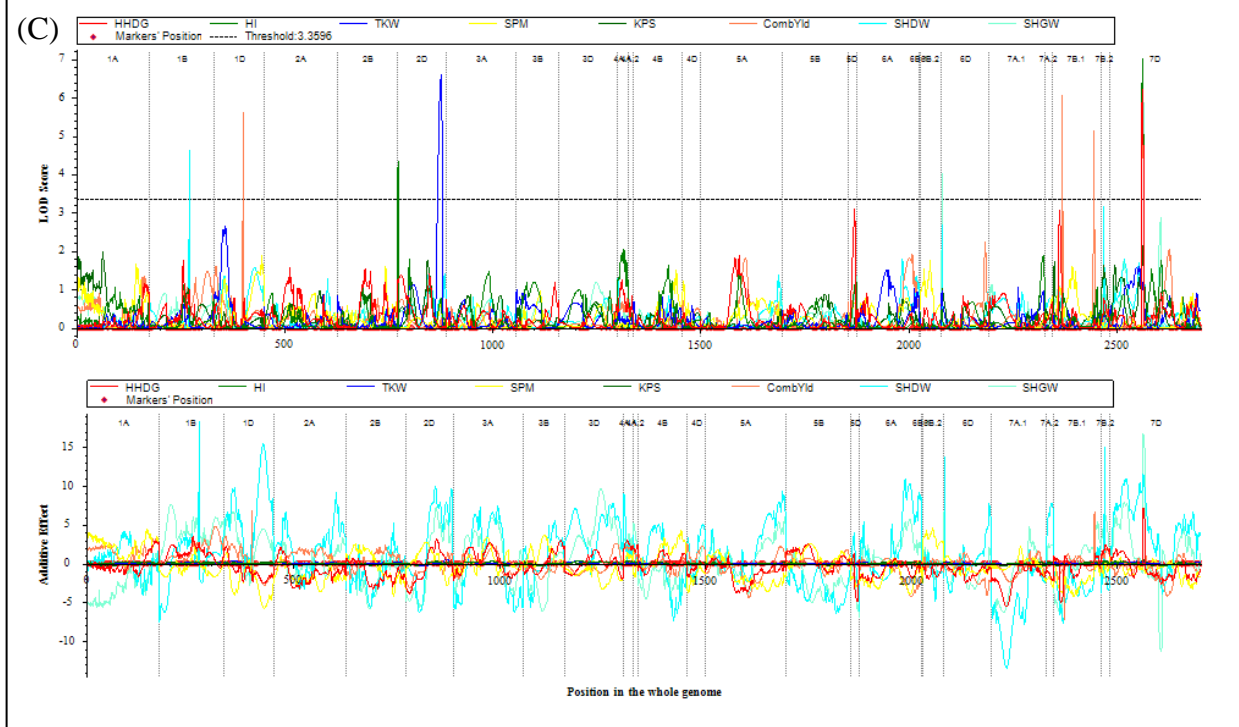

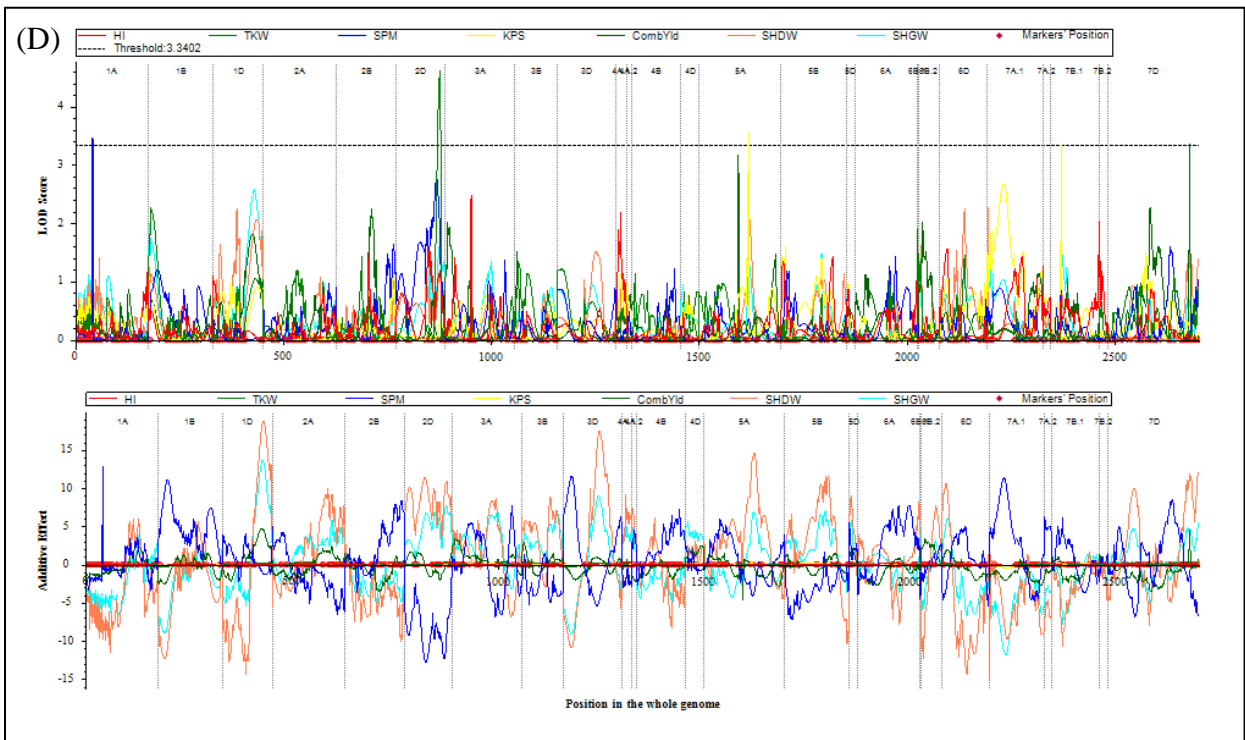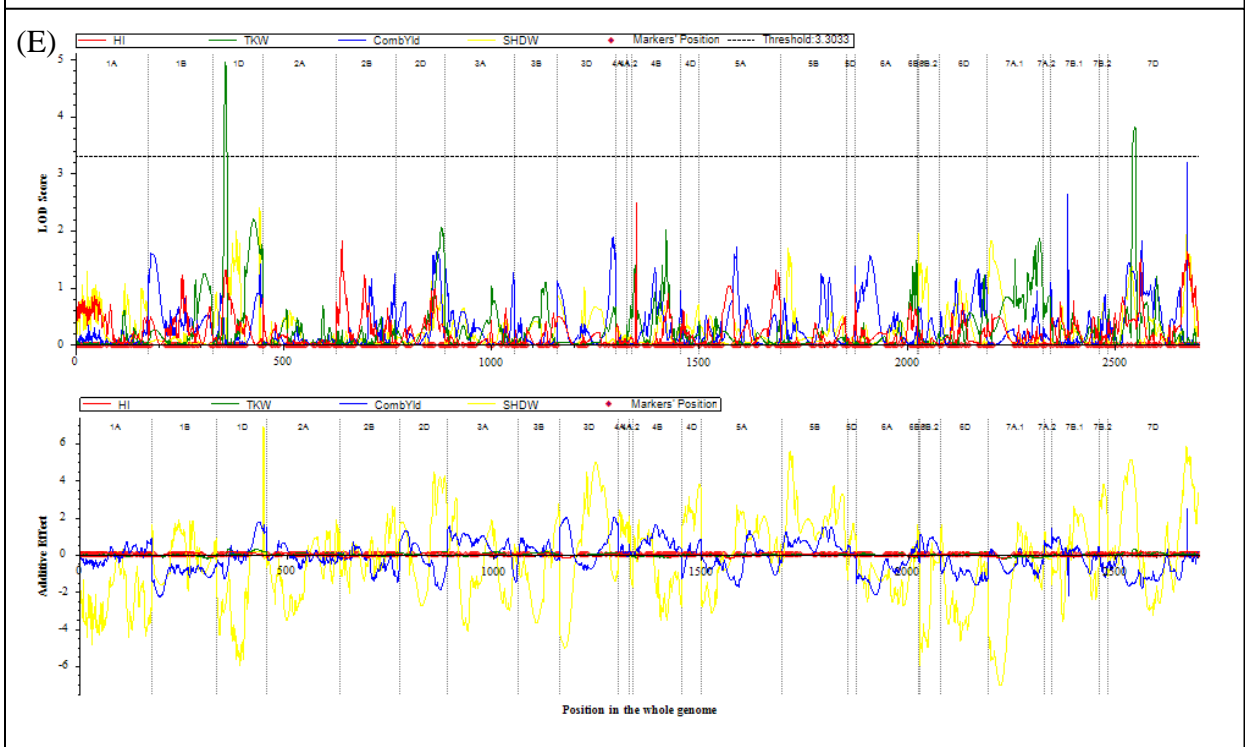

(F)

### All Traits

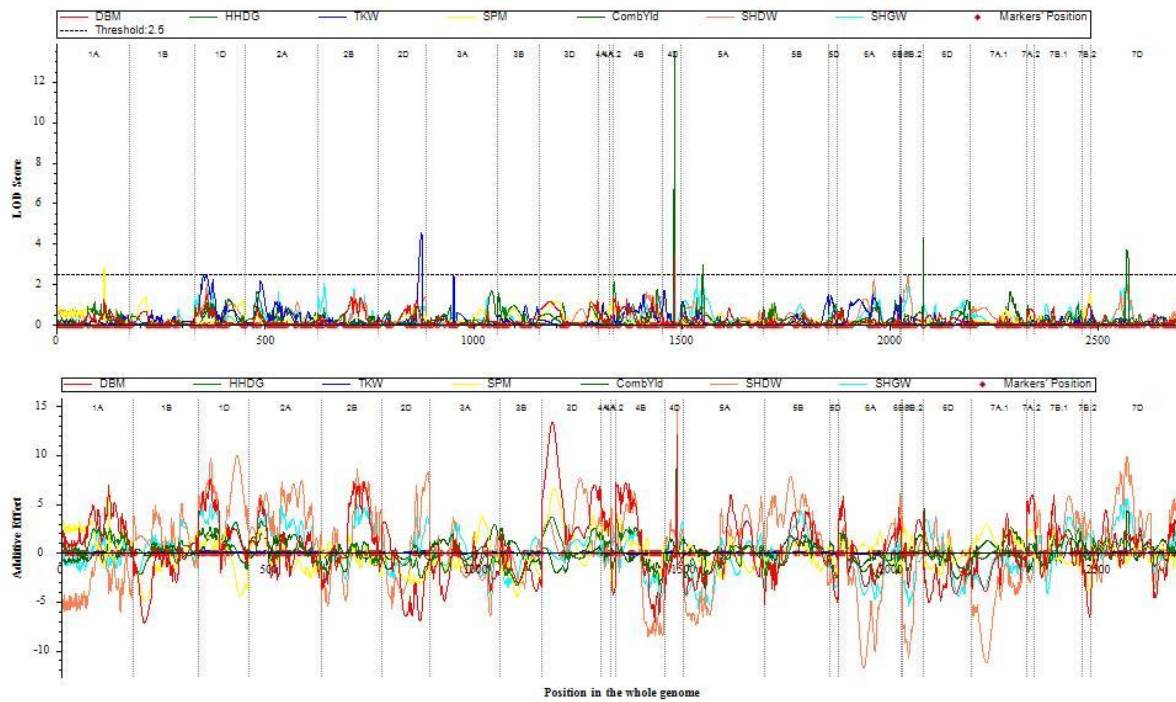

(G)

### All Traits

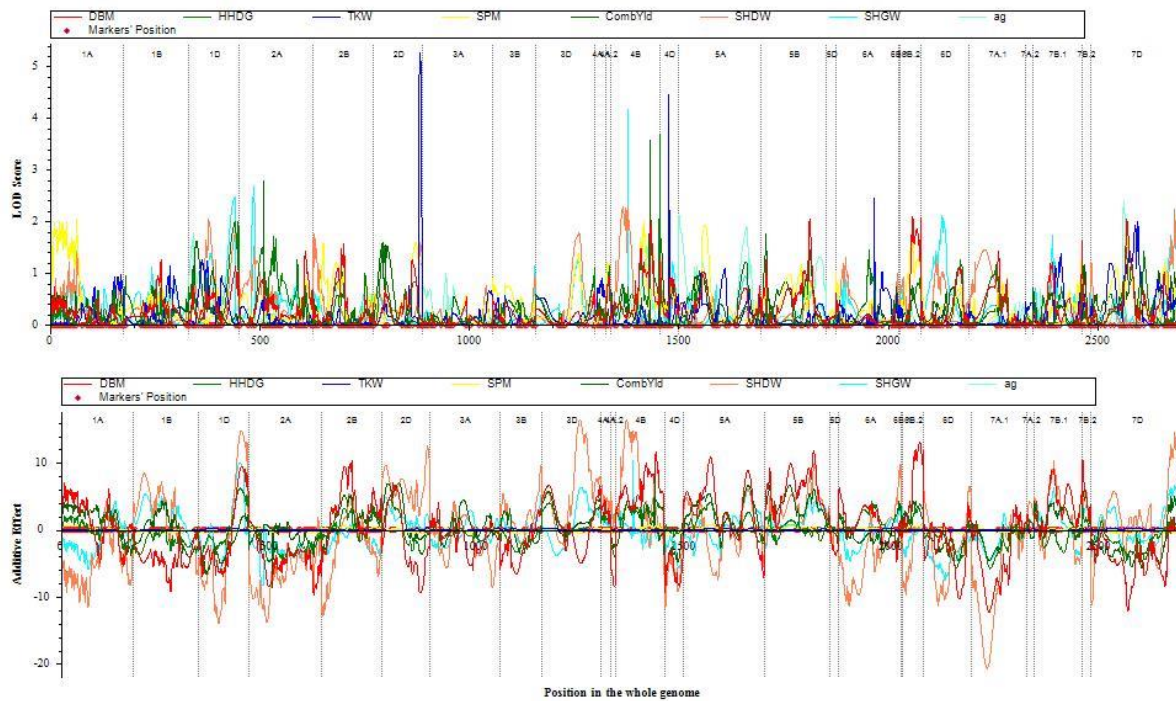



(H)

### All Traits

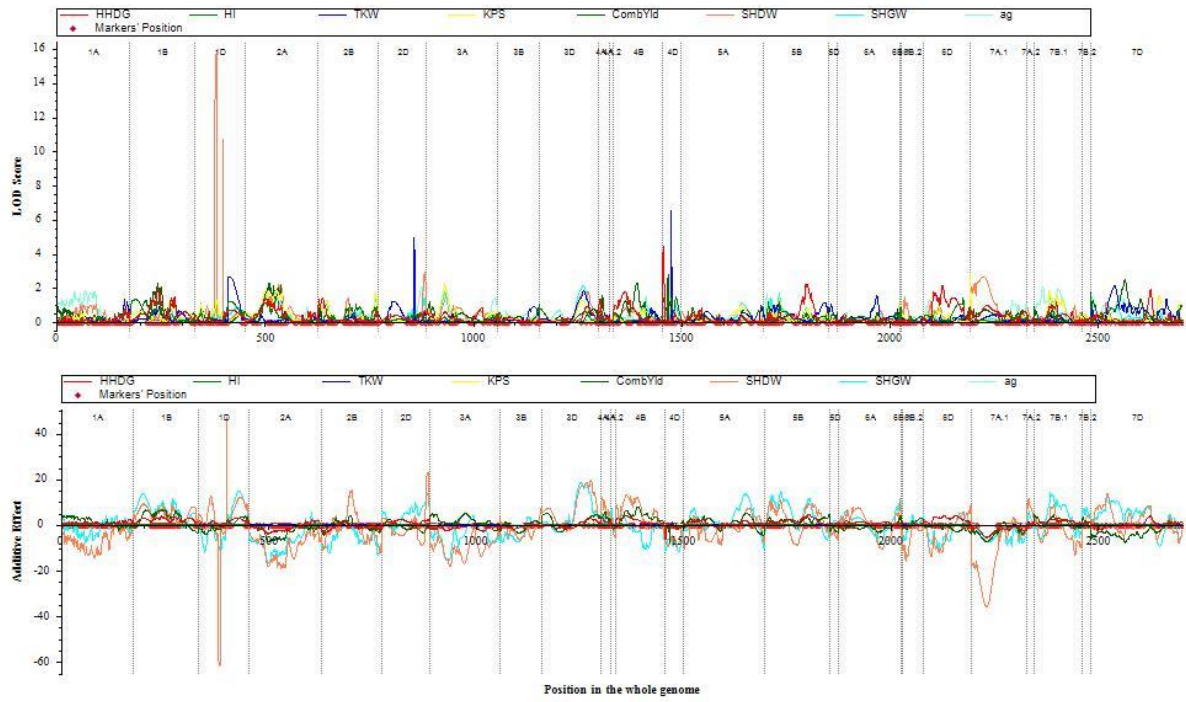

(I)

### All Traits

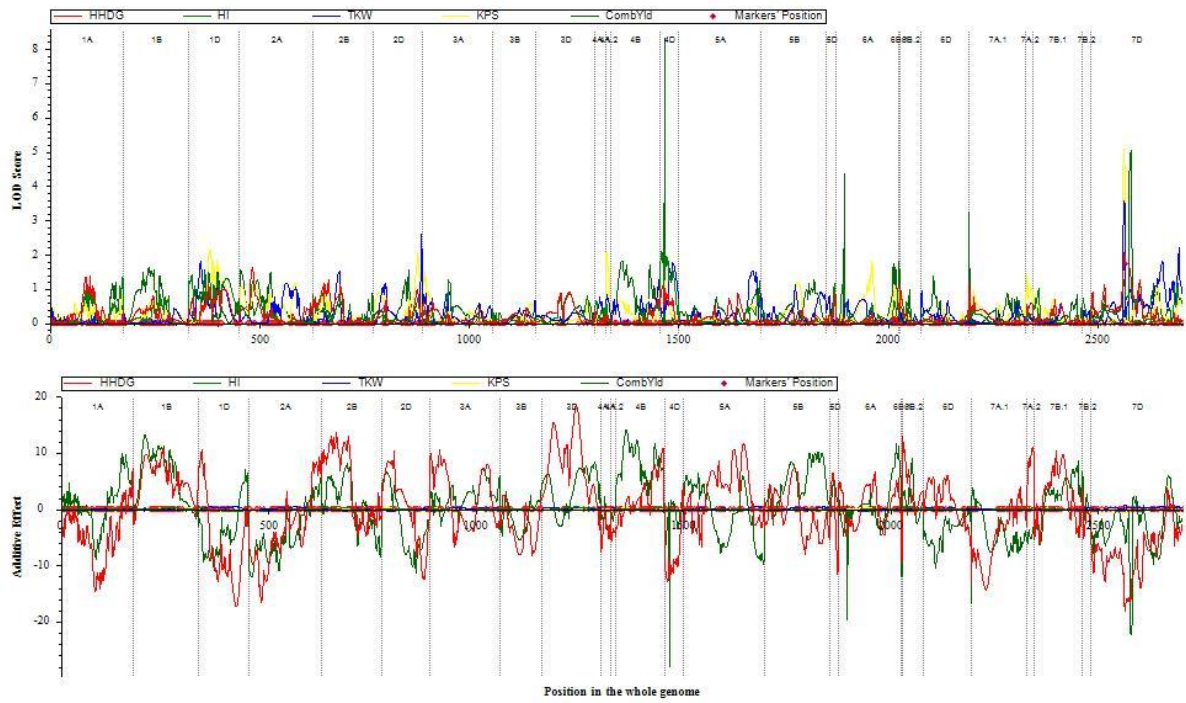

(J)

### All Traits

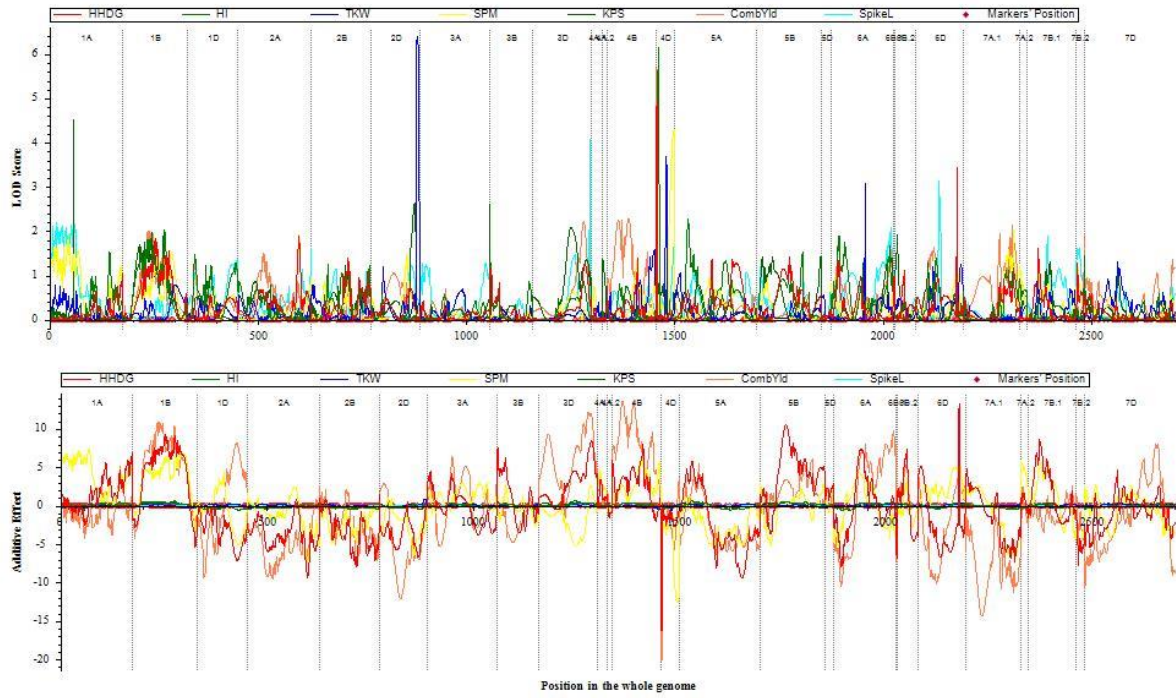

(K)

### All Traits

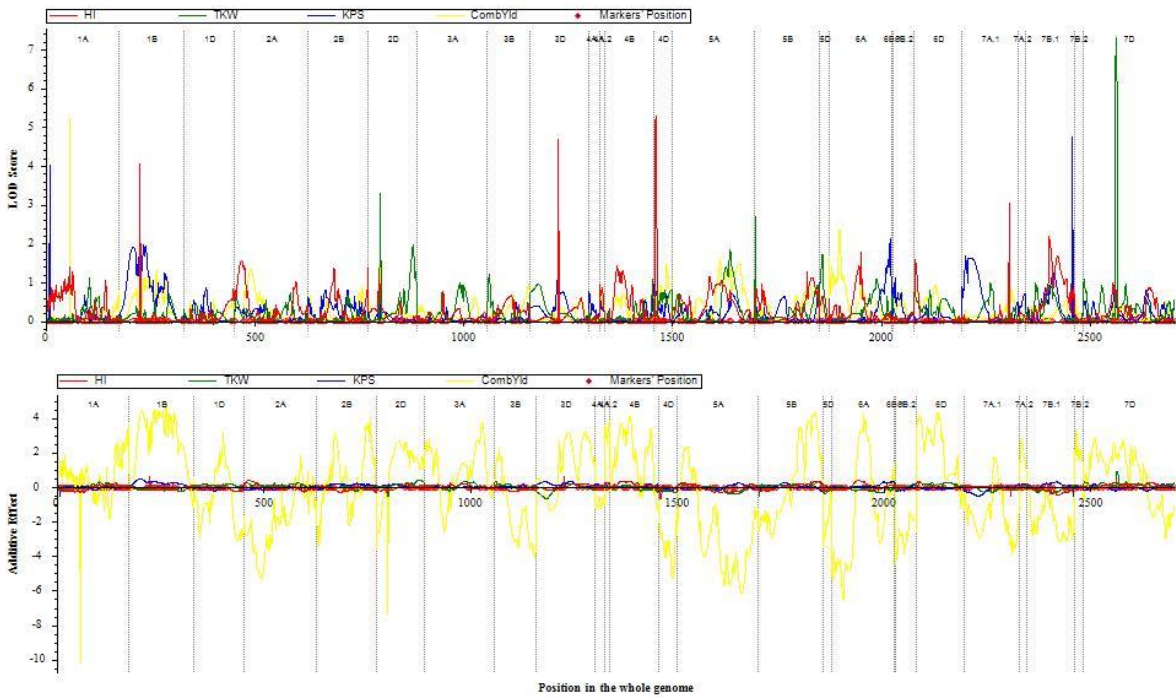

Supplement: pone.0237293.s002.pdf [file pone.0237293.s002.pdf]
